# Supplementary material for: Inflammatory macrophage to hepatocyte signals can be prevented by extracellular vesicle reprogramming
Source: Oxford University Press journal article supplement (doi:10.1242/jcs.260691), 2023-04-13
Supplement: jcs260691supp.pdf [file jcs260691supp.pdf]

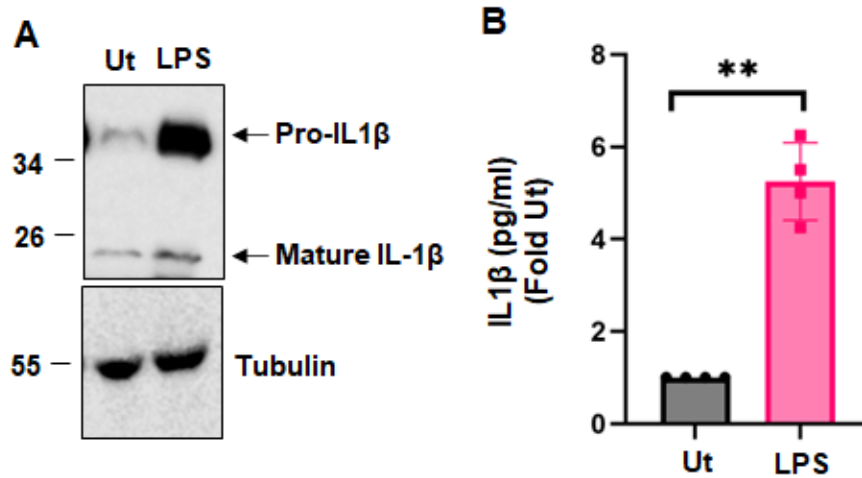

**Fig. S1. Inflammation activation in THP-1 producer cells.** (A) Western blot analysis of producer THP-1 cells treated with 100ng/ml LPS for 24hr. The amount of mature IL-1 $\beta$  is increased after LPS treatment. (B) IL-1 $\beta$  ELISA of conditioned media isolated from producer THP-1 cells treated with LPS. Data are shown as mean  $\pm$  SEM for  $n = 4$ .

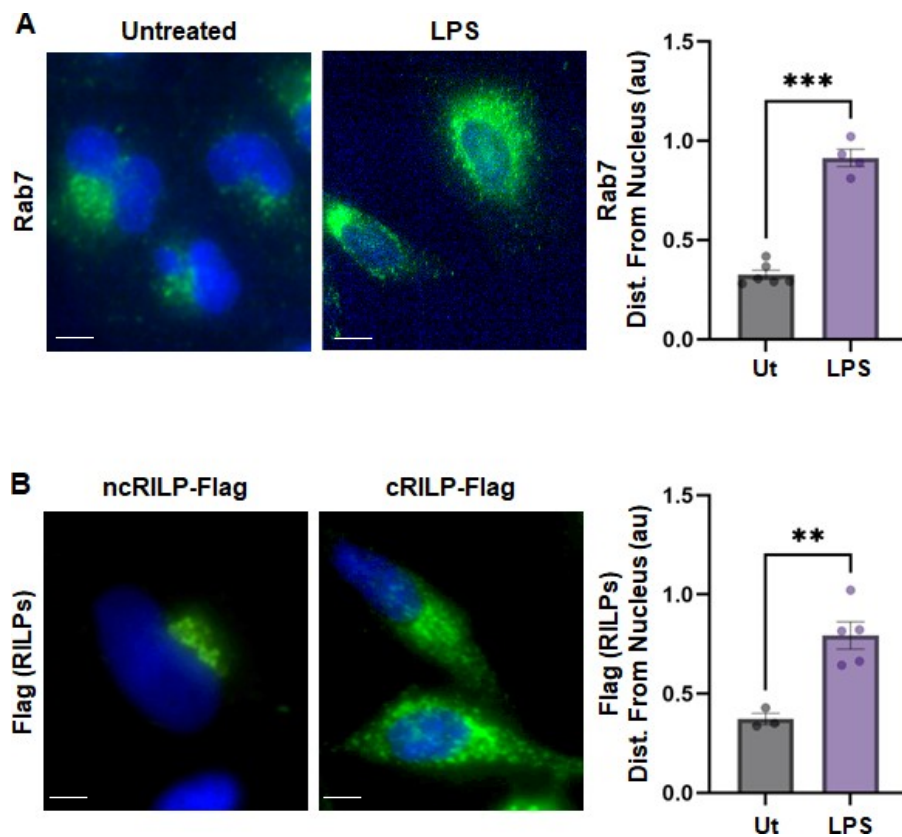

**Fig. S2. Localization of Rab7 as a surrogate for RILP cleavage.** (A) In HMC3 microglia cells, Rab7 serves as a marker of RILP cleavage in immunofluorescence. At baseline, Rab7 localizes at the perinuclear region, near the mitotic center. This localization mirrors that of non-cleavable RILP (B, **ncRILP**). After RILP cleavage via inflammasome activation with LPS, Rab7 redistributes throughout the cellular periphery and extends to the plasma membrane. This localization is similar to that seen when cleaved RILP is overexpressed (B, **cRILP**). The bar graphs represent an ImageJ analysis measuring the distance the Rab7<sup>+</sup> or RILP<sup>+</sup> puncta are from the nucleus. Data are shown as mean  $\pm$  SEM; \*,  $P \leq 0.05$  for  $n =$  a minimum of 15 cells from 3-5 individual experiments. Scale bar: 10 $\mu$ m.

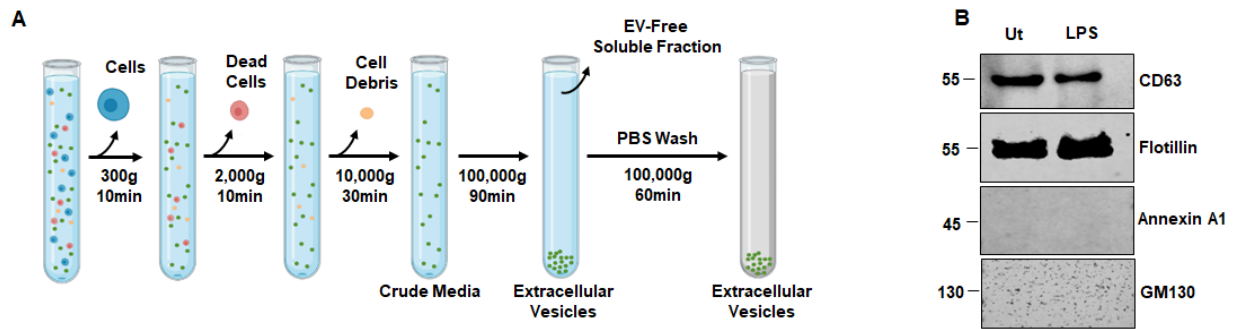

**Fig. S3. (A)** Cell culture supernatants were collected from control and LPS-treated THP-1 cells and subjected to differential centrifugation to separate the EV-free soluble fraction from the EV pellet. **(B)** Western blot analysis showed that the EV pellets contain known exosomal markers (CD63 and Flotillin) but do not contain the microvesicle marker annexin A1 or components of other organelles including the Golgi.

**Table S1. Primers used in this study.**

| <b>Primer Name</b>      | <b>Primer Sequence (5'-3')</b> |
|-------------------------|--------------------------------|
| hIL-1 $\beta$ Forward   | CATGGGATAACGAGGCTTATGT         |
| hIL-1 $\beta$ Reverse   | CCCAAGGCCACAGGTATTT            |
| hIL6_Foward             | ACTCACCTCTTCAGAACGAATTG        |
| hIL6_Reverse            | CCATCTTTGGAAGGTTTCAGGTTG       |
| hIL33_Foward            | GTGACGGTGTGATGGTAAGAT          |
| hIL33_Reverse           | AGCTCCACAGAGTGTTCCTTG          |
| hCRP Forward            | AGACATGTTCGAGGAAGGCTTTT        |
| hCRP Reverse            | TCGAGGACAGTTCCTGTAGAA          |
| hHMGB-1-Forward         | GGACAAGGCCCGTTATGAAA           |
| hHMGB-1-Reverse         | GCAGAAGAGGAAGAAGGCCGAA         |
| hCCL2_Foward            | ATGAAAGTCTCTGCCGCCCTTCT        |
| hCCL2_Reverse           | TGAGTGTTC AAGTCTTCGGAGTT       |
| hTNF $\alpha$ _Forward  | TCTTCTCGAACCCCGAGTGA           |
| hTNF $\alpha$ _Reverse  | CCTCTGATGGCACCACCAG            |
| hIL10_Foward            | TCAAGGCGCATGTGAACTCC           |
| hIL10_Reverse           | GATGTCAAAC TACTCATGGCT         |
| hTGF $\beta$ -1 forward | TATCGCCAGGAATTGTTGCTG          |
| hTGF $\beta$ -1 reverse | CAATTCCTGGCGATACCTCAG          |
| hGAPDH-F                | GAAGGTGAAGGTCGGAGTC            |
| hGAPDH-R                | GAAGATGGTGATGGGATTTC           |
| mCRP Forward            | GAAC TTT CAGCCGAATACATCTTTT    |
| mCRP Reverse            | CCTTCCTCGACATGTCTGTCT          |
| mIL-1 $\beta$ -Forward  | TCGCTCAGGGTCACAAGAAA           |
| mIL-1 $\beta$ -Reverse  | CATCAGAGGCAAGGAGGAAAAC         |
| mTGF- $\beta$ -Forward  | GTGTGGAGCAACATGTGGA ACTCTA     |
| mTGF- $\beta$ -Reverse  | TTGGTTCAGCCACTGCCGTA           |
| mIL-10-Forward          | GGTTGCCAAGCCTTATCGGA           |
| mIL-10-Reverse          | ACCTGCTCCACTGCCTTGCT           |
| mTNF $\alpha$ -Forward  | AGGCTCTGGAGAACAGCACAT          |
| mTNF $\alpha$ -Reverse  | TGGCTTCTCTTCCTGCACCAA          |
| mArg1-Forward           | CTCCAAGCCAAAGTCCTTAGAG         |
| mArg1-Reverse           | AGGAGCTGTCATTAGGGACATC         |
| mCCL2-Forward           | GTTGGCTCAGCCAGATGCA            |
| mCCL2-Reverse           | AGCCTACTCATTGGGATCATCTTG       |
| mHMGB-1-Forward         | GGCGAGCATCCTGGCTTATC           |
| mHMGB-1-Reverse         | GGCTGCTTGTCATCTGCTG            |
| mIL6_Foward             | TAGTCCTTCCTACCCCAATTTC         |
| mIL6_Reverse            | TTGGTCCTTAGCCACTCCTTC          |
| mIL33_Foward            | TCCA ACTCCAAGATTTCCCCG         |
| mIL33_Reverse           | CATGCAGTAGACATGGCAGAA          |
| mGAPDH-6-Forward        | CGTCCCGTAGACAAAATGGT           |
| mGAPDH-6-Reverse        | TTGAGGTCAATGAAGGGGTC           |
